# Supplementary material for: Global Proteomics-based Identification and Validation of Thymosin Beta-4 X-Linked as a Prognostic Marker for Head and Neck Squamous Cell Carcinoma
Source: PubMed Central journal article supplement (PMC5567379; doi:10.1038/s41598-017-09539-w), 2017-08-22

Supplementary Information

**Global Proteomics-based Identification and Validation of Thymosin  
Beta-4 X-Linked as a Prognostic Marker for Head and Neck  
Squamous Cell Carcinoma**

Li-Hsing Chi<sup>1,2,3</sup>, Wei-Min Chang<sup>2</sup>, Yu-Chan Chang<sup>2</sup>, Yung-Chieh Chan<sup>2</sup>, Chia-Chen  
Tai<sup>2</sup>, Kam-Wing Leung<sup>4,5</sup>, Chi-Long Chen<sup>6,7</sup>, Alexander TH Wu<sup>1</sup>, Tsung-Ching Lai<sup>2,\*</sup>,  
Yu-Chuan (Jack) Li<sup>1,8,\*</sup>, and Michael Hsiao<sup>1,2,9,\*</sup>

<sup>1</sup>The Ph.D. Program for Translational Medicine, College of Medical Science and  
Technology, Taipei Medical University and Academia Sinica, Taipei, Taiwan,

<sup>2</sup>Genomics Research Center, Academia Sinica, Taipei, Taiwan

<sup>3</sup>Division of Oral and Maxillofacial Surgery, Department of Dentistry, Taipei  
Medical University Hospital, Taipei, Taiwan

<sup>4</sup>Department of Dentistry, Yuan's General Hospital, Kaohsiung, Taiwan

<sup>5</sup>Departments of Dentistry, Kaohsiung Veterans General Hospital, Kaohsiung, Taiwan

<sup>6</sup>Department of Pathology, Taipei Medical University Hospital, Taipei Medical  
University, Taipei, Taiwan

<sup>7</sup>Department of Pathology, College of Medicine, Taipei Medical University, Taipei,  
Taiwan.

<sup>8</sup>Graduate Institute of Biomedical Informatics, College of Medicine Science and  
Technology, Taipei Medical University, Taipei, Taiwan

<sup>9</sup>Department of Biochemistry, College of Medicine, Kaohsiung Medical University,  
Kaohsiung, Taiwan

\* Correspondence to Dr. Tsung-Ching Lai, Genomics Research Center, Academia Sinica, Taiwan, E-mail: [chuching@gate.sinica.edu.tw](mailto:chuching@gate.sinica.edu.tw); Dr. Yu-Chuan (Jack) Li, Graduate Institute of Biomedical Informatics, College of Medical Science and Technology, Taipei Medical University, Taipei, Taiwan, [jaak88@gmail.com](mailto:jaak88@gmail.com); Dr. Michael Hsiao, Genomics Research Center, Academia Sinica, Taiwan, [mhsiao@gate.sinica.edu.tw](mailto:mhsiao@gate.sinica.edu.tw).

**Supplementary Table S1.** There are 30 proteins identified exclusively in seven HNSCC cell lines. (IPI: international protein index database; \* the MASCOT score of the candidate protein)

| Accession   | Protein ID                                                                         | Mass  | Ca9- | Cal- | HSC- | SAS | SCC- | TW  | TW  |
|-------------|------------------------------------------------------------------------------------|-------|------|------|------|-----|------|-----|-----|
|             |                                                                                    |       | 22   | 27   | 3    |     | 4    | 1.5 | 2.6 |
| IPI00024742 | Ubiquinol-cytochrome c reductase complex ubiquinone-binding protein QP-C           | 9769  | 38   | 88   | 67   | 147 | 102  | 102 | 155 |
| IPI00798268 | 12 kDa protein                                                                     | 12318 | 59   | 200  | 143  | 159 | 104  | 128 | 62  |
| IPI00005038 | Ribonuclease UK114                                                                 | 14542 | 184  | 84   | 87   | 85  | 209  | 136 | 102 |
| IPI00795445 | 17 kDa protein                                                                     | 17203 | 48   | 134  | 64   | 32  | 48   | 142 | 66  |
| IPI00791107 | Protein                                                                            | 18091 | 59   | 225  | 143  | 159 | 104  | 128 | 62  |
| IPI00791570 | Hypothetical protein XRCC5 (Fragment)                                              | 18434 | 62   | 147  | 34   | 68  | 92   | 107 | 61  |
| IPI00291608 | Isoform 1 of PEST proteolytic signal-containing nuclear protein                    | 18913 | 177  | 238  | 211  | 284 | 205  | 295 | 261 |
| IPI00020965 | Ubiquitin-conjugating enzyme E2 H                                                  | 20699 | 59   | 48   | 79   | 34  | 35   | 84  | 53  |
| IPI00790763 | Hypothetical protein HSPD1 (Fragment)                                              | 25139 | 48   | 356  | 64   | 73  | 48   | 193 | 66  |
| IPI00017454 | CDNA FLJ19940 fis, clone Y79AA1000833, moderately similar to TUBULIN ALPHA-1 CHAIN | 27757 | 106  | 146  | 103  | 128 | 44   | 121 | 105 |
| IPI00030357 | Dihydrogolate reductase                                                            | 28940 | 100  | 184  | 96   | 120 | 109  | 115 | 44  |
| IPI00061108 | Isoform 1 of Ribosome recycling factor, mitochondrial precursor                    | 29373 | 60   | 88   | 155  | 181 | 141  | 194 | 120 |
| IPI00154975 | DnaJ homolog subfamily C member 9                                                  | 30062 | 155  | 132  | 166  | 402 | 154  | 96  | 95  |
| IPI00001754 | Junctional adhesion molecule A precursor                                           | 32962 | 84   | 55   | 50   | 37  | 53   | 90  | 45  |
| IPI00296215 | Tumor-associated calcium signal transducer 1 precursor                             | 35582 | 135  | 147  | 94   | 149 | 78   | 102 | 91  |
| IPI00009659 | Uncharacterized protein C20orf77                                                   | 36991 | 308  | 87   | 42   | 371 | 261  | 139 | 353 |
| IPI00013468 | Mitotic checkpoint protein BUB3                                                    | 37587 | 368  | 235  | 115  | 259 | 165  | 139 | 48  |
| IPI00216057 | Sorbitol dehydrogenase                                                             | 38899 | 108  | 95   | 30   | 30  | 99   | 72  | 92  |
| IPI00026215 | Flap endonuclease 1                                                                | 42908 | 252  | 144  | 139  | 146 | 143  | 209 | 225 |
| IPI00410693 | Isoform 1 of Plasminogen activator inhibitor 1 RNA-binding protein                 | 44995 | 125  | 157  | 121  | 234 | 142  | 166 | 77  |
| IPI00012535 | DnaJ homolog subfamily A member 1                                                  | 45581 | 245  | 235  | 112  | 358 | 198  | 153 | 50  |

|             |                                                       |       |     |      |     |      |     |     |     |
|-------------|-------------------------------------------------------|-------|-----|------|-----|------|-----|-----|-----|
| IPI00219029 | Aspartate aminotransferase, cytoplasmic               | 46447 | 294 | 496  | 111 | 220  | 98  | 556 | 277 |
| IPI00217223 | Multifunctional protein ADE2                          | 50389 | 65  | 132  | 210 | 191  | 281 | 223 | 103 |
| IPI00012442 | Ras GTPase-activating protein-binding protein 1       | 52189 | 112 | 132  | 36  | 128  | 217 | 33  | 86  |
| IPI00552590 | chaperonin containing TCP1, subunit 6A isoform b      | 53711 | 91  | 302  | 223 | 235  | 242 | 269 | 62  |
| IPI00018873 | Isoform 1 of Nicotinamide phosphoribosyltransferase   | 55772 | 159 | 129  | 40  | 237  | 110 | 135 | 193 |
| IPI00002214 | Importin alpha-2 subunit                              | 58168 | 327 | 120  | 129 | 217  | 95  | 163 | 121 |
| IPI00784154 | 60 kDa heat shock protein, mitochondrial precursor    | 61187 | 46  | 1102 | 277 | 1841 | 229 | 392 | 267 |
| IPI00179953 | NASP Isoform 1 of Nuclear autoantigenic sperm protein | 85471 | 495 | 222  | 239 | 271  | 109 | 128 | 116 |
| IPI00017451 | SF3A1 Splicing factor 3 subunit 1                     | 88888 | 186 | 66   | 156 | 198  | 108 | 111 | 104 |

**Supplementary Table S2.** In the correlation analysis of clinicopathological features, the patients with high IHC expression of TMSB4X in nuclei were not significantly associated with those features.

| Features         | Case no | TMSB4X_nuc |            | P value |
|------------------|---------|------------|------------|---------|
|                  |         | Low(n=38)  | High(n=48) |         |
| Age at diagnosis |         |            |            |         |
| <65 y            | 70      | 30 42.9%   | 40 57.1%   | 0.403   |
| ≥65 y            | 16      | 8 50.0%    | 8 50.0%    |         |
| Gender           |         |            |            |         |
| Male             | 79      | 35 44.3%   | 44 55.7%   | 0.630   |
| Female           | 7       | 3 42.9%    | 4 57.1%    |         |
| T Status         |         |            |            |         |
| T1+T2            | 60      | 23 38.3%   | 37 61.7%   | 0.077   |
| T3+T4            | 26      | 15 57.7%   | 11 42.3%   |         |
| N Status         |         |            |            |         |
| N0               | 59      | 27 45.8%   | 32 54.2%   | 0.422   |
| N1-N3            | 27      | 11 40.7%   | 16 59.3%   |         |
| M Status         |         |            |            |         |
| M0               | 84      | 37 44.0%   | 47 56.0%   | 0.691   |
| M1               | 2       | 1 50.0%    | 1 50.0%    |         |
| Clinical Stage   |         |            |            |         |
| Stage I+II       | 45      | 19 42.2%   | 26 57.8%   | 0.434   |
| Stage III+IV     | 41      | 19 46.3%   | 22 53.7%   |         |
| Recurrence       |         |            |            |         |
| No               | 32      | 15 46.9%   | 17 53.1%   | 0.435   |
| Yes              | 54      | 23 42.6%   | 31 57.4%   |         |

**Supplementary Figure S1.** The Venn diagram: A summary of proteins identified in NHOK, OMF and HNSCC by LC-MS/MS.

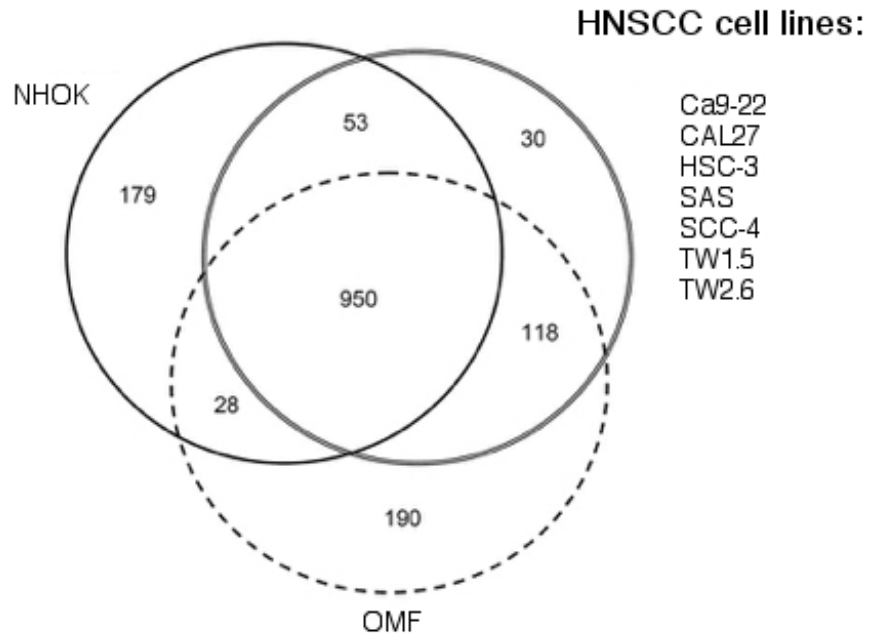

**Supplementary Figure S2.** The quality control on every tissue array slide of HNSCC cohort. (A) presented the TMSB4X IHC staining as positive staining control from the xenograft tumor of colon cancer cell line, DLD1. (B) showed the negative staining of DLD1 tumor with isotype antibody IgG. (C) and (D) showed the TMSB4X staining of other two colon cancer cell lines, SW620 and Cx-1, respectively.

**A** DLD1 TMSB4X

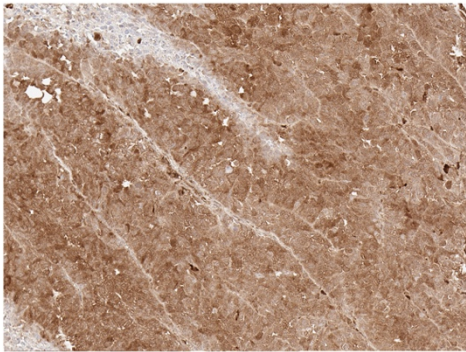

**B** DLD1 IgG

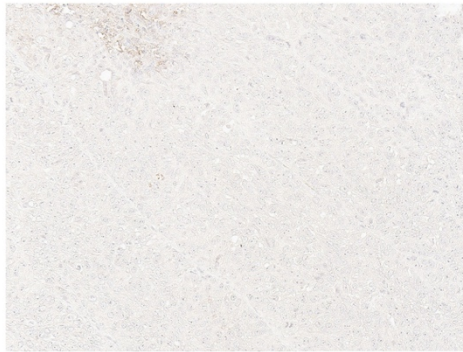

**C** SW620 TMSB4X

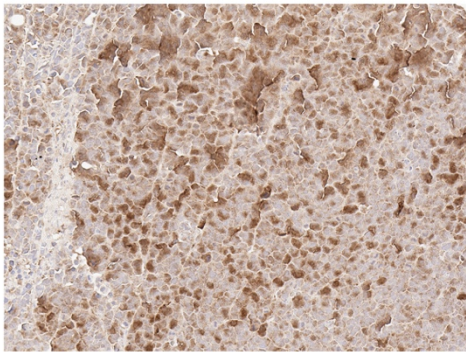

**D** Cx-1 TMSB4X

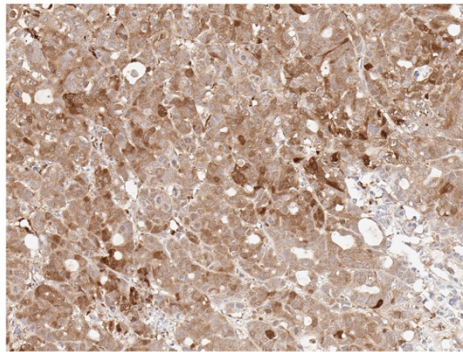

**Supplementary Figure S3.** The nuclear expression of TMSB4X was not significant correlated with the prognosis in our HNSCC cohort. (A) The representative images with different IHC intensity of TMSB4X in nuclei. (B) And (C) the Kaplan-Meier estimates of OS ( $P = 0.869$ ) and RFS ( $P = 0.624$ ) were categorized by nuclear TMSB4X level. Statistics was calculated by log-rank test.

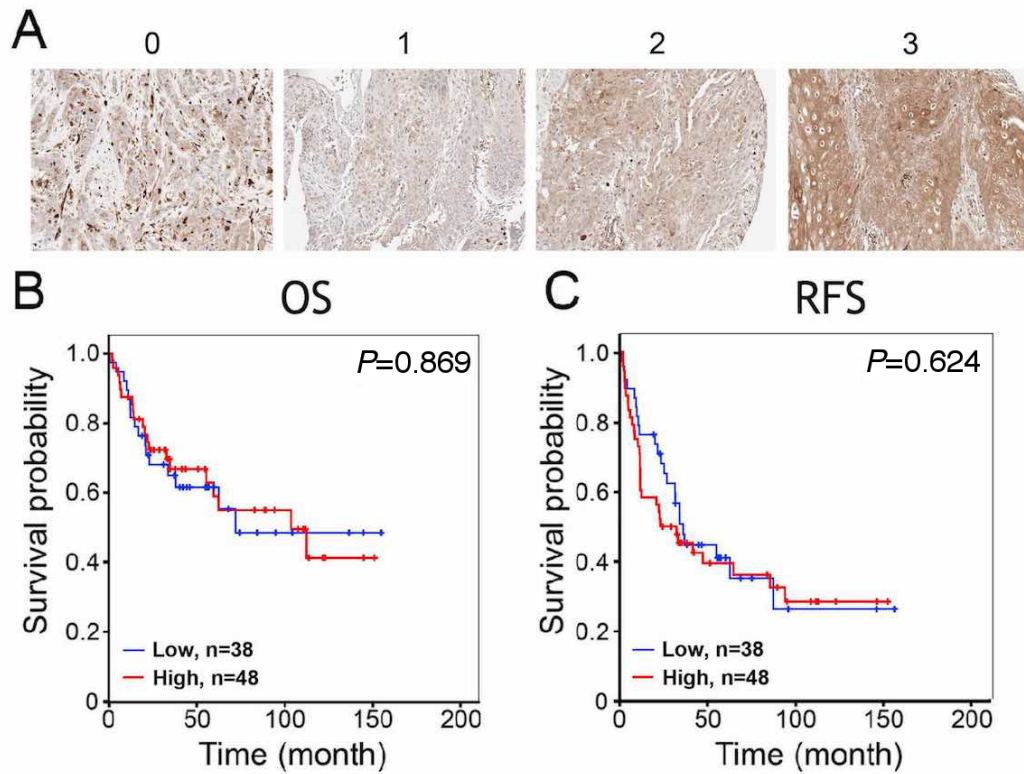

Supplement: 41598_2017_9539_MOESM1_ESM.pdf [file 41598_2017_9539_MOESM1_ESM.pdf]
